# Supplementary material
Source: PubMed Central journal article supplement (PMC7812594)
Supplement: cb0c00673_si_001.pdf [file cb0c00673_si_001.pdf]

**Plasmalogen biosynthesis by anaerobic bacteria: Identification of a two-gene operon responsible for plasmalogen production in *Clostridium perfringens***

David R. Jackson<sup>1</sup>, Chelsi D. Cassilly<sup>1</sup>, Damian R. Plichta<sup>2</sup>, Hera Vlamakis<sup>2</sup>, Hualan Liu<sup>3</sup>, Stephen B. Melville<sup>3</sup>, Ramnik J. Xavier<sup>2,4,5</sup>, Jon Clardy<sup>1</sup>

1. Department of Biological Chemistry and Molecular Pharmacology, Harvard Medical School, Boston MA 02115.
2. Broad Institute of MIT and Harvard, Cambridge, MA 02142.
3. Department of Biological Sciences, Virginia Tech, Blacksburg, VA, 24061, USA
4. Department of Molecular Biology, Massachusetts General Hospital, Boston, MA 02114.
5. Center for the Study of Inflammatory Bowel Disease, Massachusetts General Hospital, Boston, MA 02114.

| <b>Bacterial Strains</b>                       | <b>Description</b>                                                                | <b>Source</b>                               |
|------------------------------------------------|-----------------------------------------------------------------------------------|---------------------------------------------|
| <i>C. perfringens</i> HN13                     | Wild-type <i>C. perfringens</i> strain                                            | Nariya et. al., 2011 (reference 15)         |
| <i>C. perfringens</i> HN13 Tn library          | Previously constructed Tn mutant library                                          | Prof. Stephen Melville                      |
| <i>C. perfringens</i> HN13- $\Delta$ PlsA PlsR | <i>C. perfringens</i> HN13 lacking CPE1194/1195                                   | This work                                   |
| <i>E. coli</i> BL21(DE3)                       | <i>E. coli</i> strain for overexpression of pPlsCP                                | New England Biolabs                         |
| <i>E. coli</i> DH5 $\alpha$                    | <i>E. coli</i> strain for cloning                                                 | New England Biolabs                         |
| <i>E. faecalis</i> OG1RF                       | <i>E. faecalis</i> model strain analyzed for plasmalogen content                  | A gift from Prof. Danielle Garsin           |
|                                                |                                                                                   |                                             |
| <b>Plasmids</b>                                | <b>Description</b>                                                                | <b>Source</b>                               |
| pUC19                                          | Plasmid for capturing Tn insertion sites fragments                                | New England Biolabs                         |
| pCM-GalK                                       | Plasmid to create deletions in <i>C. perfringens</i> HN13                         | Nariya et. al., 2011 (reference 15)         |
| pCM-GALK- $\Delta$ 1194/1195                   | pCM-GALK containing 5' and 3' flanking regions of CPE1194/CPE1195                 | This work                                   |
| pET-28a                                        | inducible <i>E. coli</i> expression vector                                        | Novagen                                     |
| pPlsCP                                         | pET-28a containing CPE1194/1195 inserted at NheI/BamHI                            | This work                                   |
| pPlsEF                                         | pET-29b containing the <i>E. faecalis</i> EF1327 gene inserted at NdeI/XhoI       | This work                                   |
|                                                |                                                                                   |                                             |
| <b>Primers</b>                                 | <b>Description</b>                                                                | <b>Sequence</b>                             |
| OHL21                                          | sequencing primer to map cloned Tn insertion sites                                | GCAATGAAACACGCCAAAGTAAACAATTTAAGTACCG       |
| OHL22                                          | sequencing primer to map cloned Tn insertion sites                                | GTTTTATTATTTGGTTGAGTACTTTTTCACTCG           |
| DJ031                                          | forward primer for N-terminal CPE1194/1195 flanking region with a BamHI site      | AAAggatccCAAGTCATCCAGGATGCAAG               |
| DJ032                                          | reverse primer for N-terminal CPE1194/1195 flanking region                        | CCATAATTCCTCTAATCATACCCCTTTTATATTTTCTAGTTC  |
| DJ033                                          | forward primer for C-terminal CPE1194/1195 flanking region                        | GAACTAGAAAATATAAAAGGGGGTATGATTAGAGGAATTATGG |
| DJ034                                          | reverse primer for C-terminal CPE1194/1195 flanking region with a NheI site       | AAAgctagcTTGATACCTTATATCTGTTTTTCTAGA        |
| DJ049                                          | forward sequencing primer for CPE1194/1195 deletion in <i>C. perfringens</i> HN13 | GGCTTCTAATCCATTTACAGCCTTAAATACAGTGTAC       |
| DJ050                                          | reverse sequencing primer for CPE1194/1195 deletion in <i>C. perfringens</i> HN13 | GAGGATTTGATCAAAAGAGCCAAAGAGGG               |
| DJ009                                          | forward primer containing NheI for Pls ORF (CPE1194/1195)                         | CATGgctagcATGTATTACAAAATAGGTATTGATG         |
| DJ010                                          | forward primer containing XhoI for Pls ORF (CPE1194/1195)                         | CTctcgagTCATTCCTGTGCTATAG                   |

**Table S1.** Bacterial strains, plasmids, and primers used in this study.

|                            |                                         | <i>activation</i>                 |                   |                       |                       | <i>% identity to:</i>  |                        |
|----------------------------|-----------------------------------------|-----------------------------------|-------------------|-----------------------|-----------------------|------------------------|------------------------|
| <b>Organism</b>            | <b>Enzyme type</b>                      | <b>Subunit/<br/>domain</b>        | <b>Mass (kDa)</b> | <b>Module</b>         | <b>NCBI accession</b> | <b>PlsA<br/>(Act1)</b> | <b>PlsA<br/>(Act2)</b> |
| Clostridium perfringens    | plasmalogen synthase (CPE1195 1-288)    | PlsA (Act1)                       | 32                | activation            | WP_025647548          | 100.0                  | 30.8                   |
| Clostridium perfringens    | plasmalogen synthase (CPE1195 289-620)  | PlsA (Act2)                       | 37                | activation            | WP_025647548          | 30.8                   | 100.0                  |
| Rhodopseudomonas palustris | benzoyl-CoA reductase                   | BcrA                              | 48                | activation            | WP_013503789          | 22.9                   | 26.0                   |
| Rhodopseudomonas palustris | benzoyl-CoA reductase                   | BcrD                              | 29                | activation            | WP_013503788          | 23.4                   | 21.5                   |
| Thauera aromatica          | benzoyl-CoA reductase                   | BcrA                              | 48                | activation            | WP_107220519          | 22.0                   | 25.2                   |
| Thauera aromatica          | benzoyl-CoA reductase                   | BcrD                              | 30                | activation            | WP_107220520          | 21.9                   | 22.3                   |
| Azoarcus sp. CIB           | benzoyl-CoA reductase                   | BzdP                              | 28                | activation            | WP_050415405          | 24.1                   | 23.8                   |
| Azoarcus sp. CIB           | benzoyl-CoA reductase                   | BzdQ                              | 33                | activation            | WP_050415406          | 23.6                   | 25.1                   |
| Ferroglobus placidus       | benzoyl-CoA reductase                   | BzdP                              | 28                | activation            | WP_012965687          | 27.1                   | 21.2                   |
| Ferroglobus placidus       | benzoyl-CoA reductase                   | BzdQ                              | 33                | activation            | WP_012965688          | 27.8                   | 28.7                   |
| Fusobacterium nucleatum    | (R)-2-hydroxyglutaryl-CoA dehydratase   | HgdC                              | 27                | activation            | WP_008694125          | 25.0                   | 27.6                   |
| Acidimonacoccus fermentans | (R)-2-hydroxyglutaryl-CoA dehydratase   | HgdC                              | 27                | activation            | WP_012939153          | 29.8                   | 28.4                   |
| Clostridium difficile      | (R)-2-hydroxyisocaproyl-CoA dehydratase | HadI                              | 28                | activation            | WP_009888223          | 26.5                   | 31.0                   |
| Clostridium propionicum    | (R)-2-lactoyl-CoA dehydratase           | LcdC                              | 27                | activation            | WP_066048110          | 28.9                   | 28.7                   |
| Clostridium sporogenes     | (R)-phenyllactyl-CoA dehydratase        | FldI                              | 28                | activation            | WP_003492348          | 27.6                   | 30.0                   |
| Archaeoglobus fulgidus     | (R)-phenyllactyl-CoA dehydratase        | HgdC                              | 38                | activation            | WP_010879451          | 27.6                   | 30.0                   |
|                            |                                         | <i>reduction/<br/>dehydration</i> |                   |                       |                       | <i>% identity to:</i>  |                        |
| <b>Organism</b>            | <b>Enzyme type</b>                      | <b>Subunit/<br/>domain</b>        | <b>Mass (kDa)</b> | <b>Module</b>         | <b>NCBI accession</b> | <b>PlsA<br/>(Red1)</b> | <b>PlsR<br/>(Red2)</b> |
| Clostridium perfringens    | plasmalogen synthase (CPE1195 621-975)  | PlsA (Red1)                       | 41                | reduction/dehydration | WP_025647548          | 100.0                  | 19.8                   |
| Clostridium perfringens    | plasmalogen synthase (CPE1194)          | PlsR (Red2)                       | 48                | reduction/dehydration | WP_025647548          | 19.8                   | 100.0                  |
| Rhodopseudomonas palustris | benzoyl-CoA reductase                   | BcrC                              | 44                | reduction             | WP_013503791          | 19.9                   | 18.3                   |
| Rhodopseudomonas palustris | benzoyl-CoA reductase                   | BcrB                              | 50                | reduction             | WP_013503790          | 20.9                   | 23.1                   |
| Thauera aromatica          | benzoyl-CoA reductase                   | BcrC                              | 44                | reduction             | WP_107220517          | 19.4                   | 20.5                   |
| Thauera aromatica          | benzoyl-CoA reductase                   | BcrB                              | 49                | reduction             | WP_107220518          | 19.8                   | 21.5                   |
| Azoarcus sp. CIB           | benzoyl-CoA reductase                   | BzdN                              | 43                | reduction             | WP_050415404          | 21.6                   | 18.9                   |
| Azoarcus sp. CIB           | benzoyl-CoA reductase                   | BzdO                              | 51                | reduction             | WP_050418279          | 17.7                   | 17.3                   |
| Ferroglobus placidus       | benzoyl-CoA reductase                   | BzdN                              | 45                | reduction             | WP_148212195          | 21.0                   | 20.1                   |
| Ferroglobus placidus       | benzoyl-CoA reductase                   | BzdO                              | 49                | reduction             | WP_048086821          | 20.1                   | 19.3                   |
| Fusobacterium nucleatum    | (R)-2-hydroxyglutaryl-CoA dehydratase   | HgdA                              | 50                | dehydration           | WP_005909813          | 19.3                   | 19.9                   |
| Fusobacterium nucleatum    | (R)-2-hydroxyglutaryl-CoA dehydratase   | HgdB                              | 42                | dehydration           | WP_005909812          | 22.9                   | 21.5                   |
| Acidimonacoccus fermentans | (R)-2-hydroxyglutaryl-CoA dehydratase   | HgdA                              | 54                | dehydration           | WP_012939152          | 21.0                   | 18.0                   |
| Acidimonacoccus fermentans | (R)-2-hydroxyglutaryl-CoA dehydratase   | HgdB                              | 42                | dehydration           | WP_012939151          | 21.5                   | 20.1                   |
| Clostridium difficile      | (R)-2-hydroxyisocaproyl-CoA dehydratase | HadB                              | 46                | dehydration           | WP_009888224          | 22.0                   | 21.9                   |
| Clostridium difficile      | (R)-2-hydroxyisocaproyl-CoA dehydratase | HadC                              | 42                | dehydration           | WP_009888224          | 20.0                   | 22.7                   |
| Clostridium propionicum    | (R)-2-lactoyl-CoA dehydratase           | LcdA                              | 47                | dehydration           | WP_066048111          | 19.2                   | 22.1                   |
| Clostridium propionicum    | (R)-2-lactoyl-CoA dehydratase           | LcdB                              | 42                | dehydration           | WP_066048114          | 19.4                   | 23.5                   |
| Clostridium sporogenes     | (R)-phenyllactyl-CoA dehydratase        | FldB                              | 46                | dehydration           | WP_003492352          | 23.5                   | 20.8                   |
| Clostridium sporogenes     | (R)-phenyllactyl-CoA dehydratase        | FldC                              | 43                | dehydration           | WP_003492354          | 20.0                   | 24.3                   |
| Archaeoglobus fulgidus     | (R)-phenyllactyl-CoA dehydratase        | HgdA                              | 45                | dehydration           | WP_010879450          | 21.2                   | 22.3                   |
| Archaeoglobus fulgidus     | (R)-phenyllactyl-CoA dehydratase        | HgdB                              | 27                | dehydration           | WP_010879449          | 20.6                   | 23.5                   |

**Table S2:** Comparison of PlsA domains and PlsR to known HAD/BCR proteins.

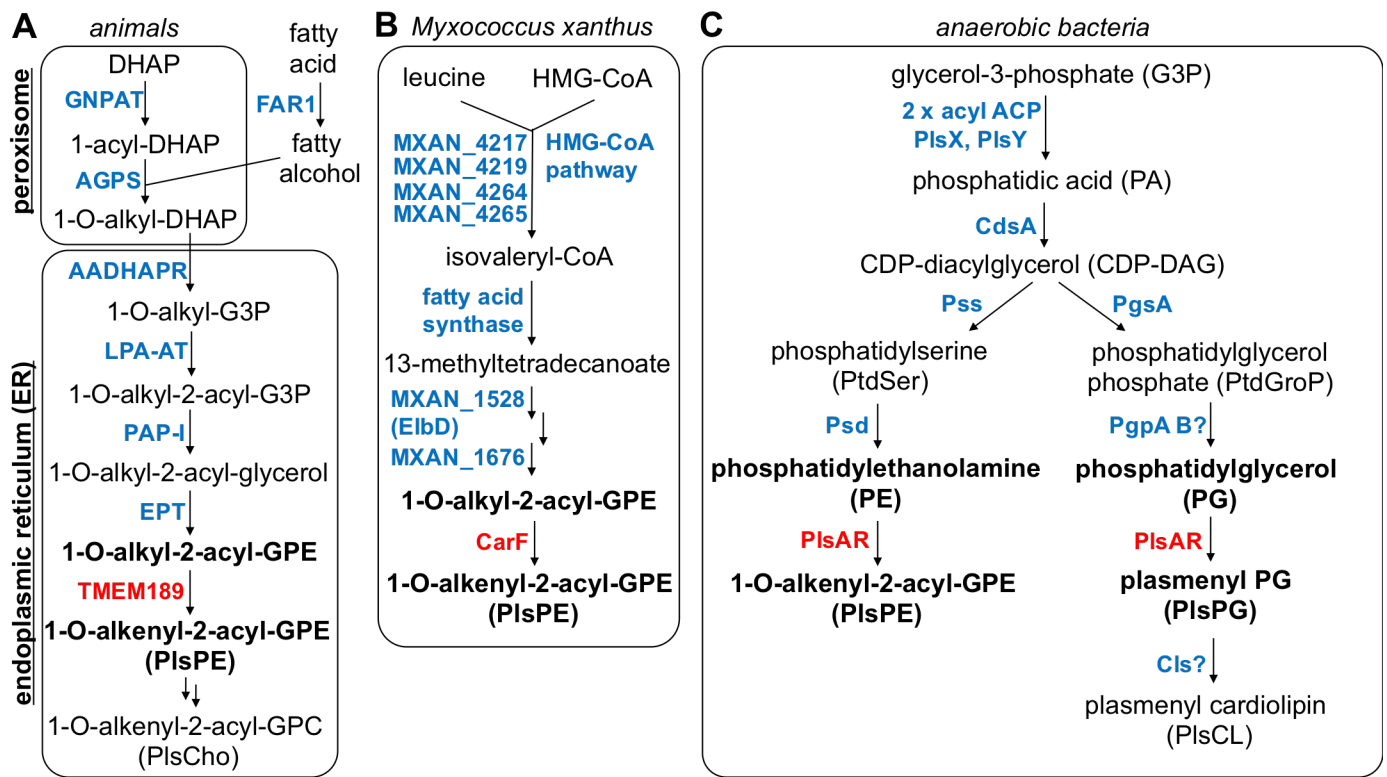

**Figure S1.** A) Plasmalogen biosynthesis in animals. B) Plasmalogen biosynthesis in the aerobic bacterium *Myxococcus xanthus*. C) Plasmalogen biosynthesis in anaerobes (proposed).

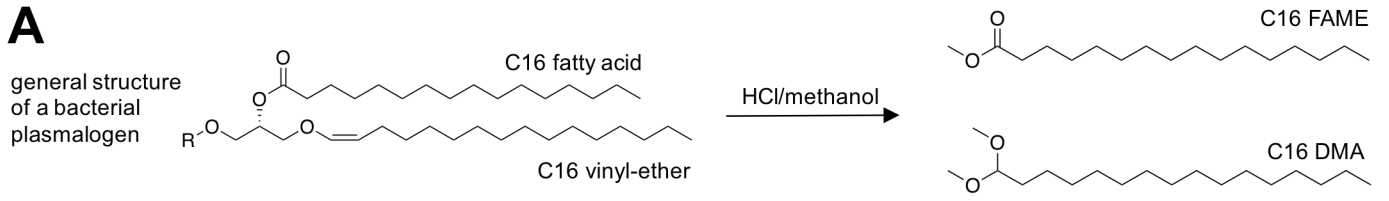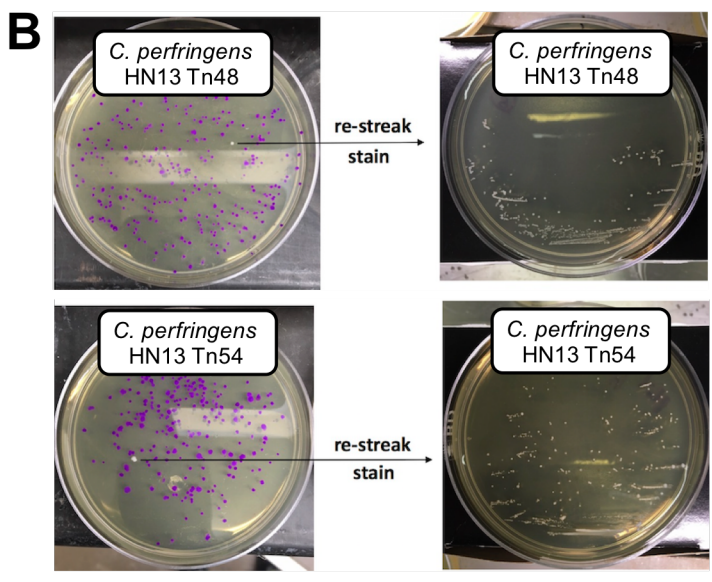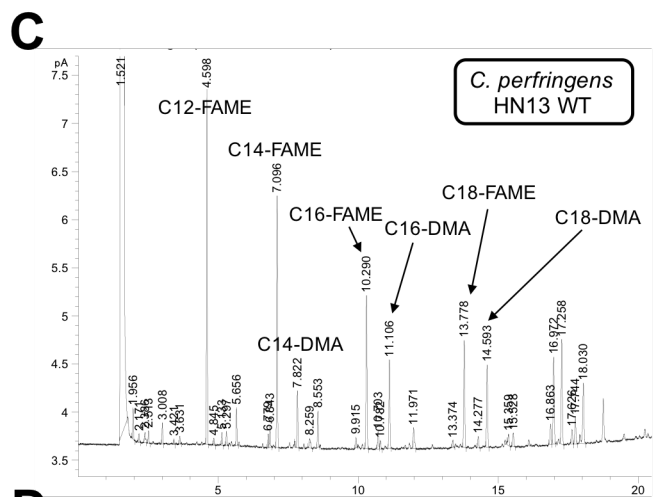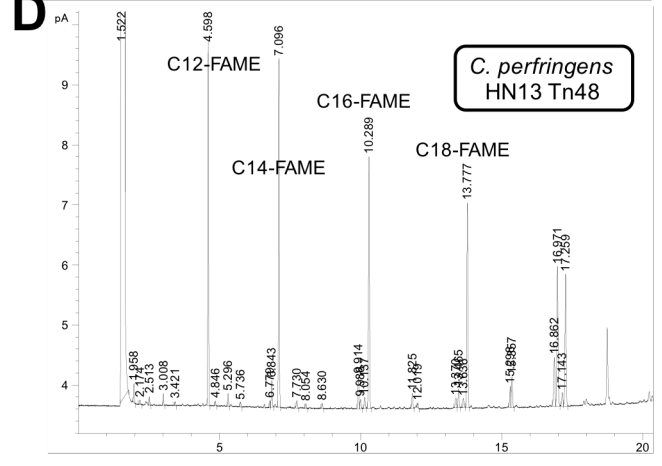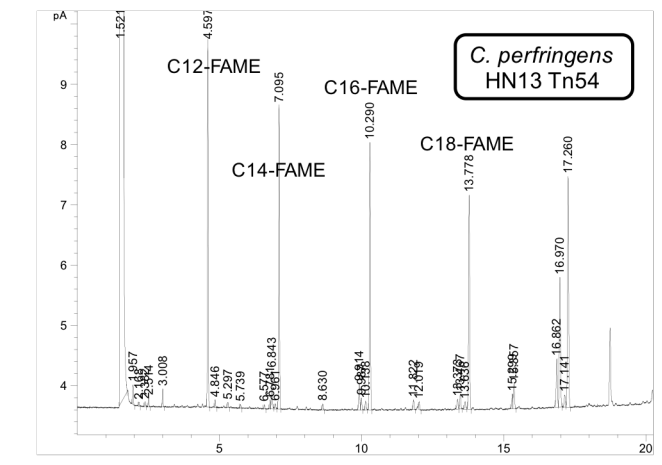

**Figure S2.** A) Schematic for FAME/DMA analysis of lipids in bacterial pellets. Plasmalogens contain an ester linked fatty acid, which is converted to a FAME, and a vinyl-ether linked fatty acid which is converted to a DMA. In the case of diacyl lipids (not shown), both ester linked fatty acids would be converted to FAMES. For the general structure of a bacterial plasmalogen, the R group is typically a phosphate-containing head group or a sugar. B) Results of *C. perfringens* Tn screen showing two distinct plasmalogen deficient colonies and isolation of these Tn mutants (Tn48 and Tn54) verified by re-streaking and re-staining with Schiff stain. C) GC-MS chromatogram of FAMES/DMAs from *C. perfringens* HN13 WT pellet lipids showing major peaks for saturated FAMES (C12, C14, C16, and C18) as major products, and the corresponding DMAs (C14, C16, and C18). D) GC-MS chromatogram of FAMES/DMAs from the *C. perfringens* HN13 transposon mutants Tn48 (top) and Tn54 (bottom) pellet lipids showing major peaks for saturated FAMES (C12, C14, C16, and C18) as major products, and the absence of any corresponding DMAs.

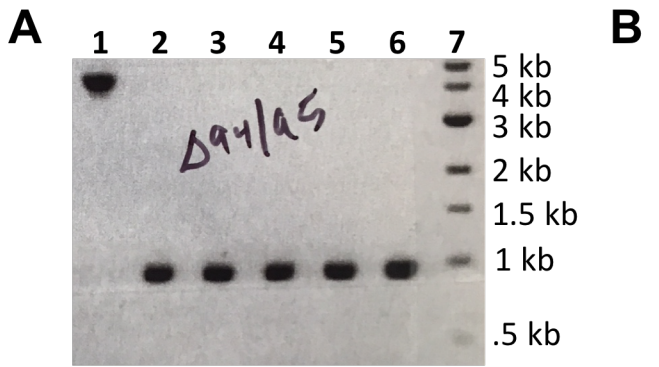

Lane 1 – *C. perfringens* HN13 WT  
 Lane 2-6 - *C. perfringens* HN13  $\Delta PlsA PlsR$  deletion  
 Lane 7 – NEB 1kb DNA ladder

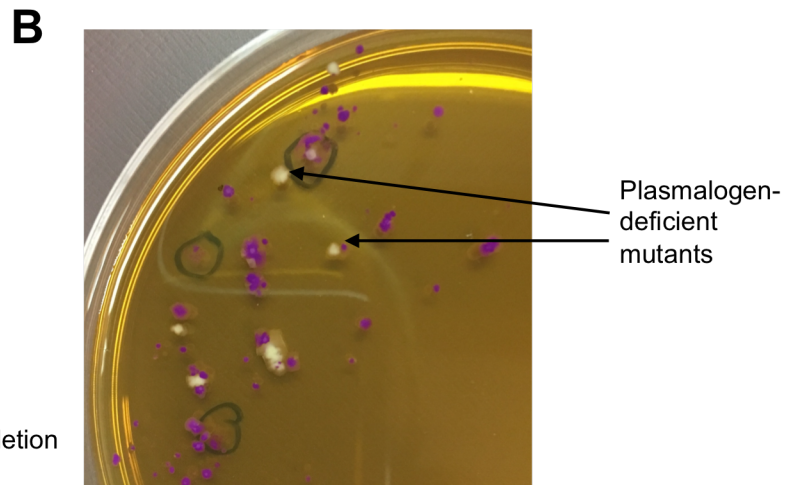

**C** *C. perfringens* HN13

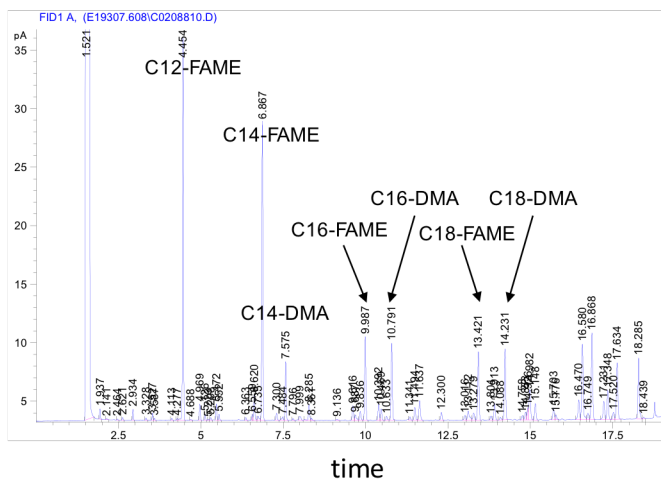

**D** *C. perfringens* HN13  $\Delta PlsA PlsR$

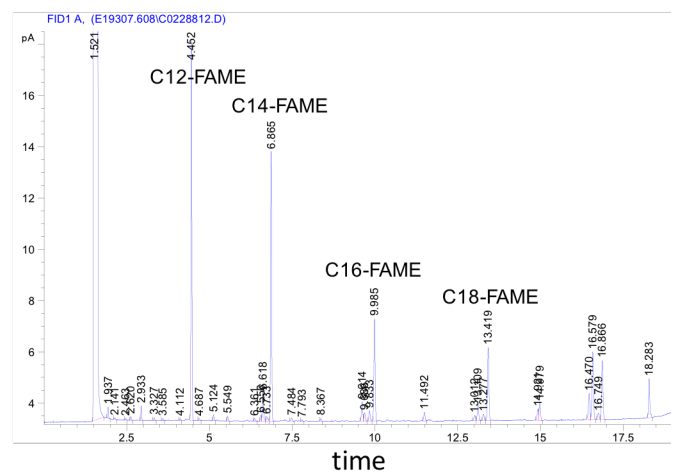

**Figure S3.** A) PCR verification of *CPE1194/1195* ( $\Delta PlsA PlsR$ ) deletion. B) Isolation of *C. perfringens* HN13  $\Delta PlsA PlsR$  deletion mutants by Schiff staining. C) GC-MS chromatogram of FAMES/DMA from WT *C. perfringens* HN13 pellet lipids showing major peaks for saturated FAMES (C12, C14, C16, and C18) as major products, and the corresponding DMAs (C14, C16, and C18). D) GC-MS chromatogram of FAMES/DMA from the *C. perfringens* HN13  $\Delta PlsA PlsR$  deletion mutant pellet lipids showing major peaks for saturated FAMES (C12, C14, C16, and C18) as major products, and the absence of any corresponding DMAs.

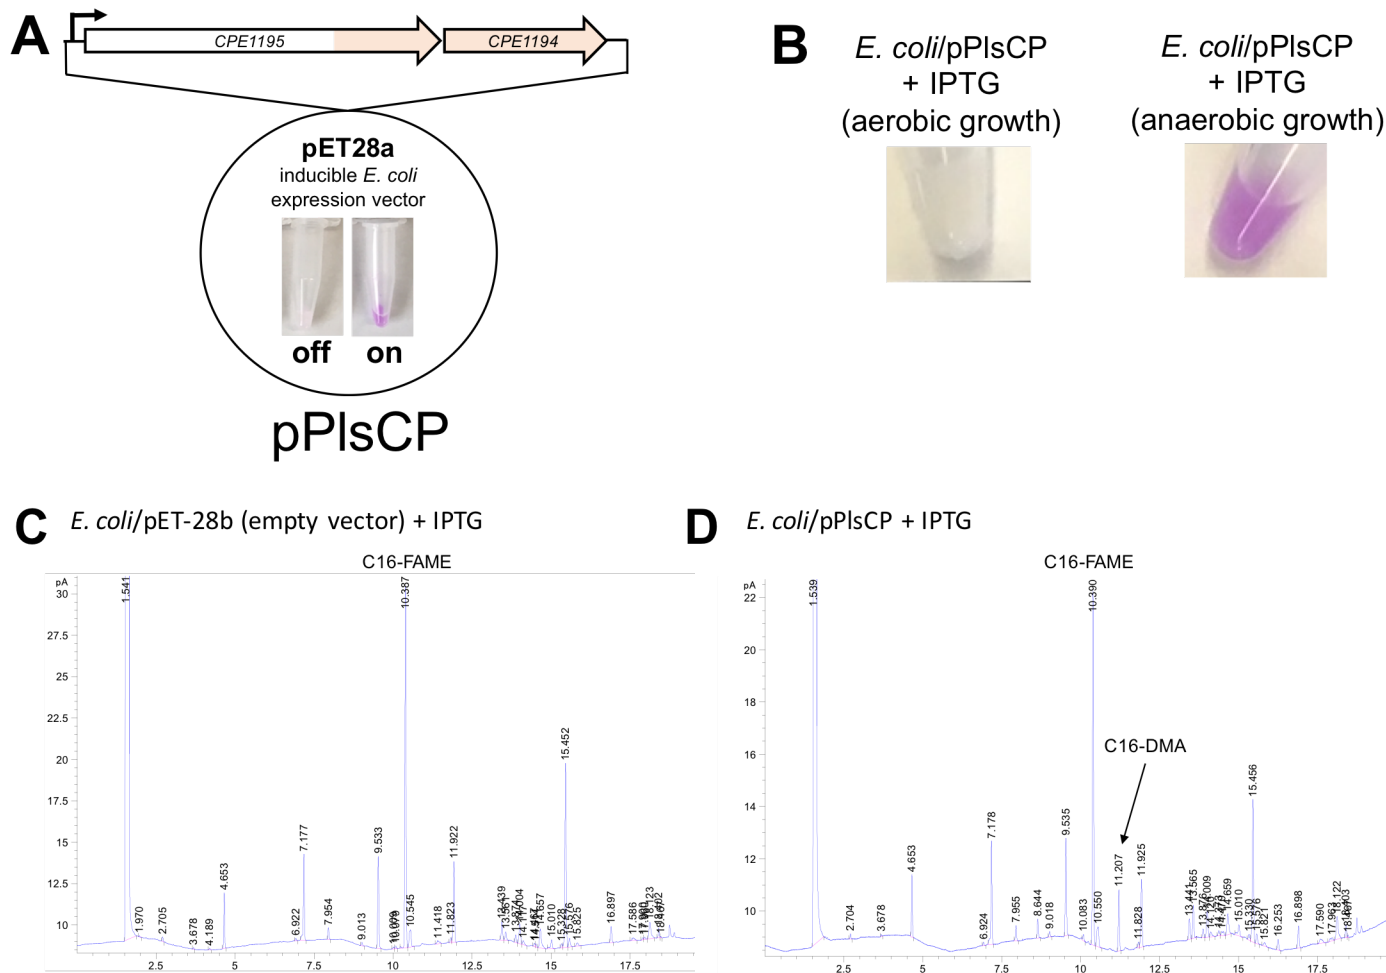

**Figure S4.** A) A schematic representation the pET28a-based expression vector for *C. perfringens* CPE1194/1195 operon. B) Pellets from 5 ml cultures *E. coli* BL21(DE3) harboring pPIsCP with IPTG induction grown aerobically (top) and anaerobically (bottom) after staining with Schiff. C) GC-MS analysis of *E. coli* BL21(DE3) harboring pET28a (empty) showing only FAMES and no DMAs, the most abundant peak is saturated C16-FAME. D) GC-MS analysis of *E. coli* BL21(DE3) harboring pPIsCP showing similar FAMES and an additional peak corresponding to C16-DMA.

**A** 2-hydroxyacyl-CoA dehydratases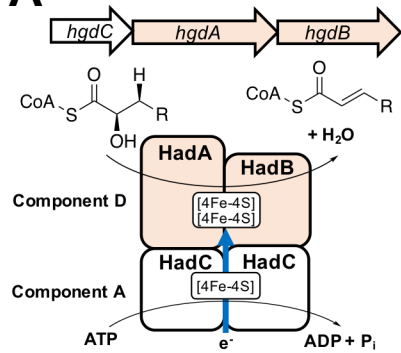**B**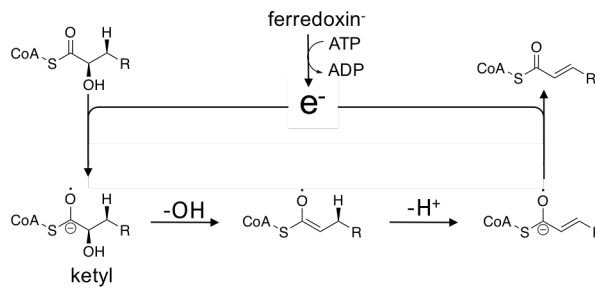**C** benzoyl-CoA reductases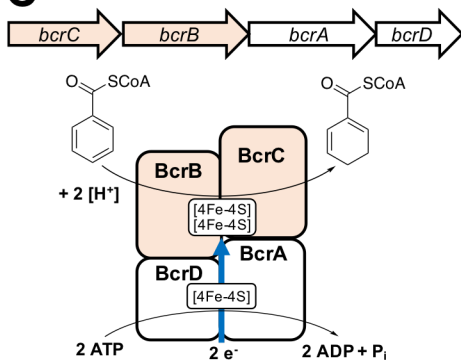**D**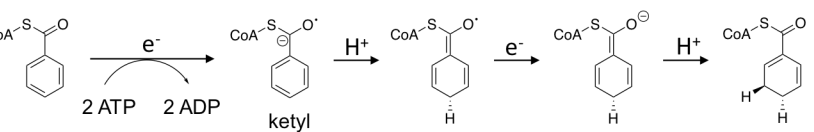**E** plasmalogen synthases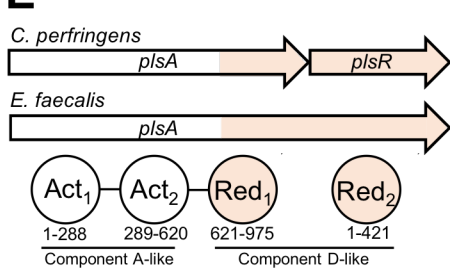**F**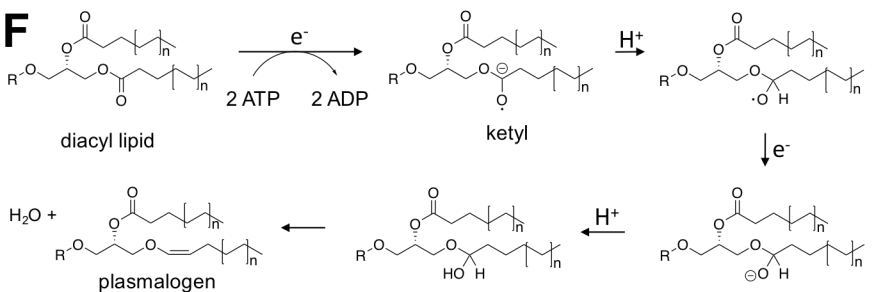

**Figure S5.** A) A typical HAD gene cluster and proposed enzyme architecture. B) HAD reaction mechanism. C) A typical BCR gene cluster and proposed enzyme architecture. D) BCR reaction mechanism. E) Different genetic architectures of the *pls* operon and proposed enzyme architecture. F) The plasmalogen synthase reaction mechanism based on the current BCR model involving two sequential single electron reductions, followed by protonation and elimination of water to yield a cis enol ether.



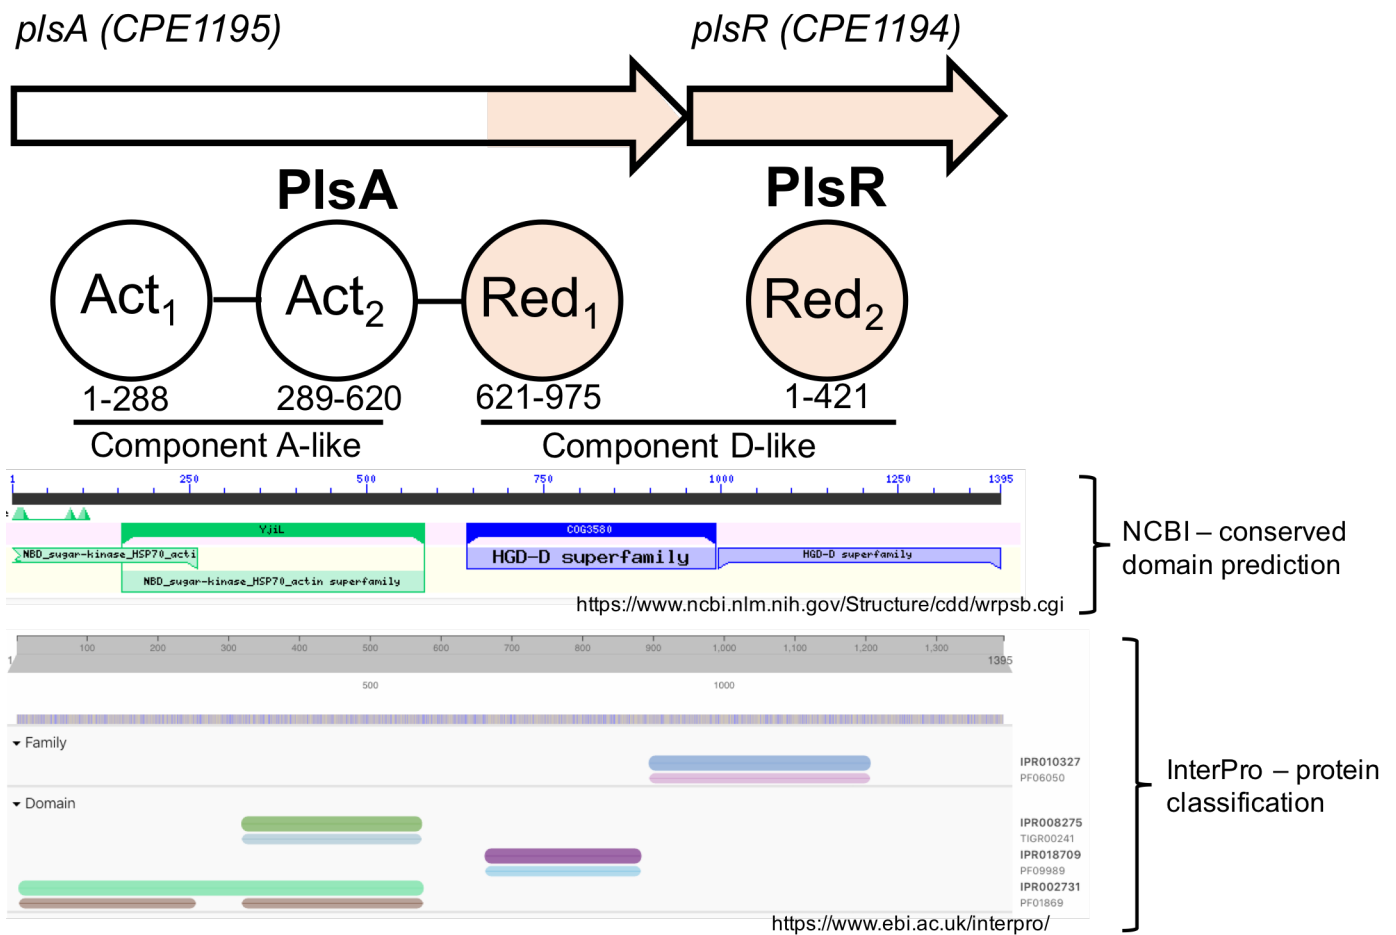

**Figure S6.** Predicted domain analysis of *CPE1194/1195* using NCBI and InterPro. *CPE1195* (*plsA*) is composed of two CoA-activase domains (Act<sub>1</sub> and Act<sub>2</sub>, component A) and one reduction/dehydration domain (Red<sub>1</sub>, component D). *CPE1194* (*plsR*) is composed of a single reduction/dehydration domain (Red<sub>2</sub>, component D).

**A**

|                                | 1      | 2      | 3      | 4      | 5      | 6      |
|--------------------------------|--------|--------|--------|--------|--------|--------|
| 1: <i>A_fulgidus</i> _HgdC     | 100.00 | 49.00  | 49.80  | 45.42  | 46.22  | 45.82  |
| 2: <i>F_nucleatum</i> _HgdC    | 49.00  | 100.00 | 63.32  | 54.41  | 57.20  | 54.83  |
| 3: <i>A_fermentas</i> _HgdC    | 49.80  | 63.32  | 100.00 | 53.70  | 56.76  | 57.98  |
| 4: <i>C_difficile</i> _HadI    | 45.42  | 54.41  | 53.70  | 100.00 | 57.85  | 55.98  |
| 5: <i>C_sporogenes</i> _FldI   | 46.22  | 57.20  | 56.76  | 57.85  | 100.00 | 55.98  |
| 6: <i>C_proprionicum</i> _LcdC | 45.82  | 54.83  | 57.98  | 55.98  | 55.98  | 100.00 |

**B**

|                              | 1      | 2      | 3      | 4      | 5      | 6      | 7      | 8      |
|------------------------------|--------|--------|--------|--------|--------|--------|--------|--------|
| 1: <i>R_palustris</i> _BcrD  | 100.00 | 71.12  | 25.00  | 23.88  | 30.12  | 28.24  | 30.92  | 28.46  |
| 2: <i>T_aromatica</i> _BcrD  | 71.12  | 100.00 | 27.99  | 25.00  | 32.05  | 29.77  | 32.06  | 26.48  |
| 3: <i>R_palustris</i> _BcrA  | 25.00  | 27.99  | 100.00 | 69.50  | 33.68  | 31.47  | 24.25  | 23.85  |
| 4: <i>T_aromatica</i> _BcrA  | 23.88  | 25.00  | 69.50  | 100.00 | 33.90  | 32.17  | 25.09  | 26.64  |
| 5: <i>Azoarcus</i> _CIB_BzdQ | 30.12  | 32.05  | 33.68  | 33.90  | 100.00 | 60.07  | 30.74  | 28.63  |
| 6: <i>F_placidus</i> _BzdQ   | 28.24  | 29.77  | 31.47  | 32.17  | 60.07  | 100.00 | 37.21  | 32.81  |
| 7: <i>Azoarcus</i> _CIB_BzdP | 30.92  | 32.06  | 24.25  | 25.09  | 30.74  | 37.21  | 100.00 | 43.02  |
| 8: <i>F_placidus</i> _BzdP   | 28.46  | 26.48  | 23.85  | 26.64  | 28.63  | 32.81  | 43.02  | 100.00 |

**Figure S7.** A) Sequence identify matrix of HAD activation domains. B) Sequence identify matrix of BCR activation domains.

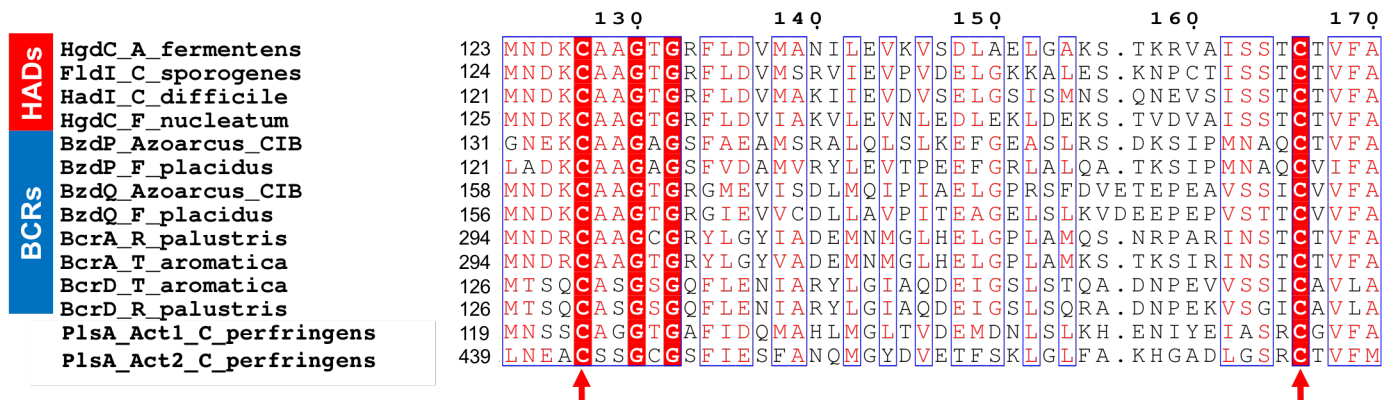

**Figure S8.** Protein sequence alignment of activation domains from HADs, BCRs, and PlsA (Act<sub>1</sub>, AAs 1-288) and PlsA (Act<sub>2</sub>, AAs 289-620) showing conserved cysteines for iron-sulfur cluster ligation.

**A** *E. faecalis* OG1RF aerobic growth

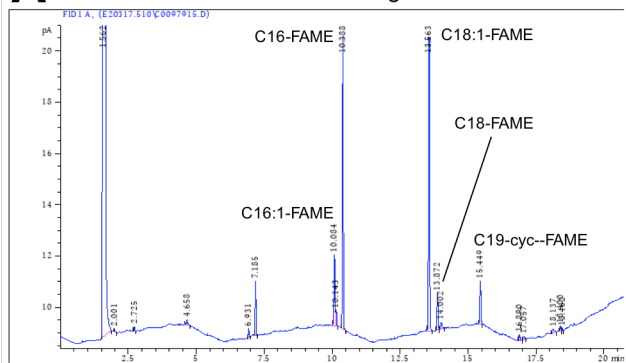

**B** *E. faecalis* OG1RF anaerobic growth

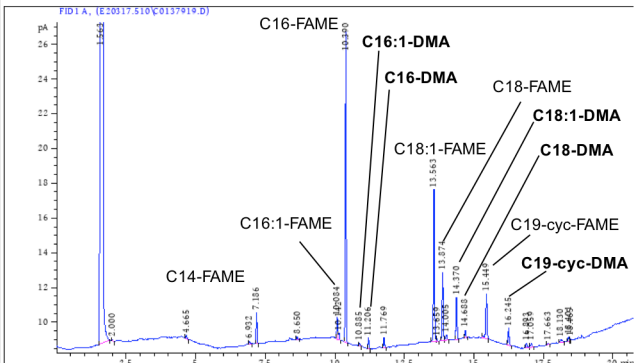

**Figure S9.** A) GC-MS analysis of *E. faecalis* grown aerobically showing only FAMEs present. B) GC-MS analysis of *E. faecalis* grown anaerobically showing FAMEs and plasmalogen-derived DMAs.

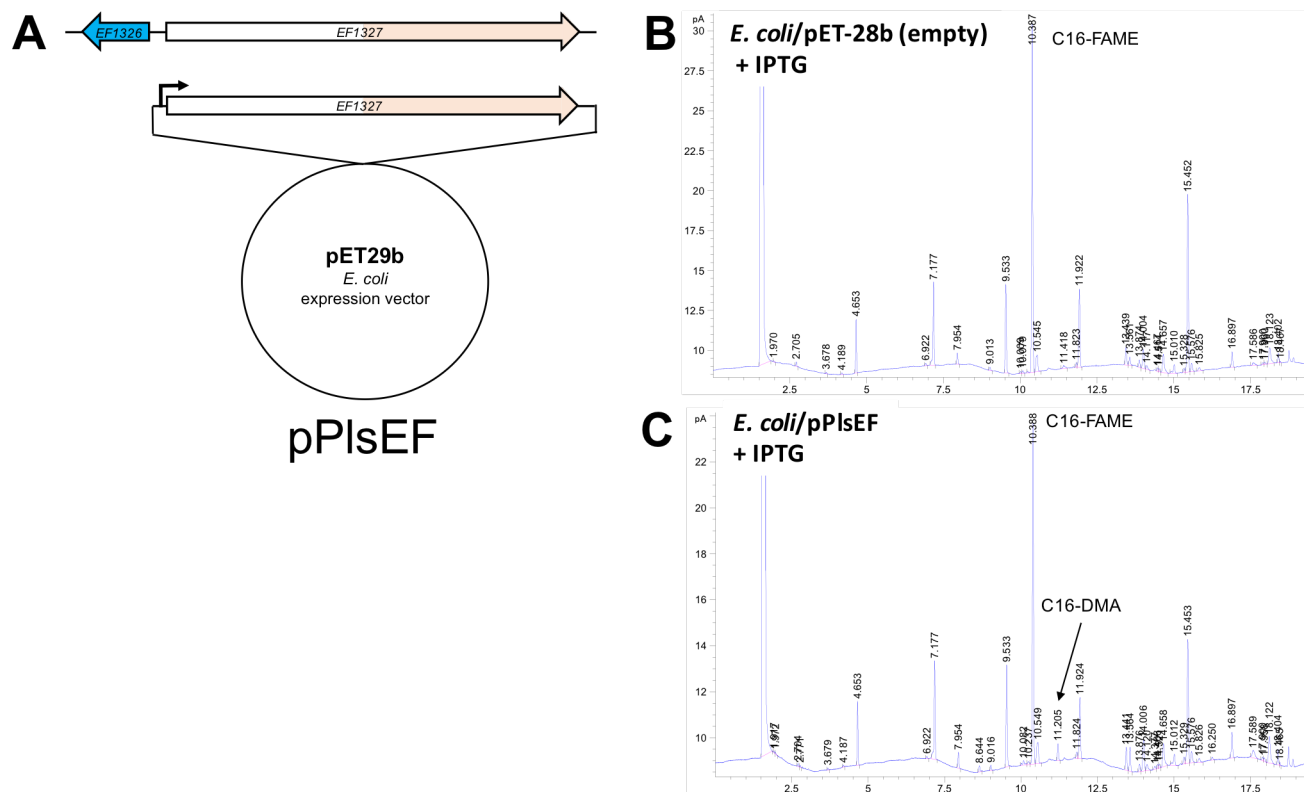

**Figure S10:** A) *E. coli* expression plasmid for the single gene *pls* operon from *E. faecalis* OG1RF. B) GC-MS analysis of *E. coli* BL21(DE3) harboring pET28a (empty) showing only FAMES and no DMAs, the most abundant peak is saturated C16-FAME. C) GC-MS analysis of *E. coli* BL21(DE3) harboring pPlsEF showing similar FAMES and an additional peak corresponding to C16-DMA.
